# Supplementary material
Source: publisher figshare collection journal article supplement (https://acs.figshare.com/ndownloader/files/7446769)
Supplement: Supplementary file 1 [file 7446769]

## Supporting Information

### **Highly stretchable and waterproof electroluminescence device based on superstable stretchable transparent electrode**

*Banseok You,<sup>1,2</sup> Youngmin Kim,<sup>1</sup> Byeong-Kwon Ju,<sup>2,\*</sup> and Jong-Woong Kim<sup>1,\*</sup>*

<sup>1</sup> Display Materials & Components Research Center, Korea Electronics Technology Institute, 68 Yatap-dong, Bundang-gu, Seongnam 463-816, South Korea

<sup>2</sup> Display and Nanosystem Laboratory, College of Engineering, Korea University, Seoul 136-713, Korea

\* B.-K. J.: bkju@korea.ac.kr

\* J.-W. K.: wyjd@keti.re.kr

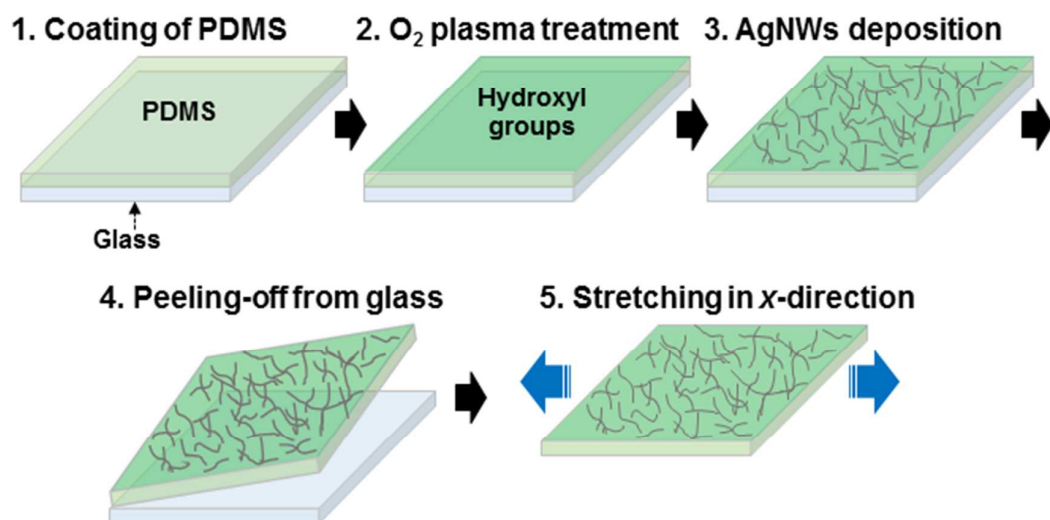

**Figure S1.** Schematic depiction of the fabrication steps of AgNWs/PDMS electrodes.

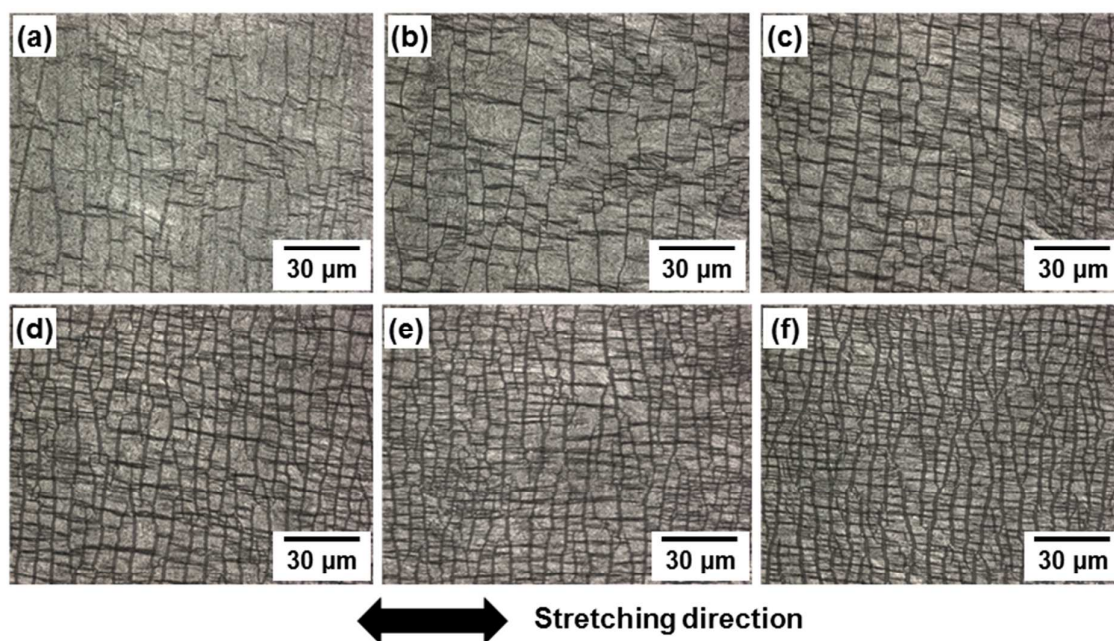

**Figure S2.** Micrographs of AgNWs on hydroxylated PDMS that are being stretched with (a) 5%, (b) 10%, (c) 25%, (d) 50%, (e) 75%, and (f) 100% strain.

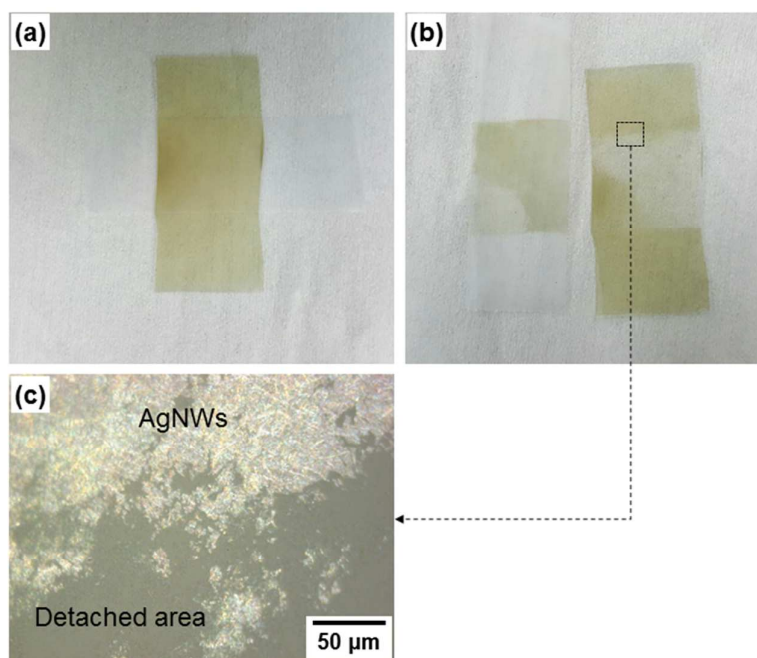

**Figure S3.** (a) Tape adhered to an AgNWs/PDMS (embedded) sample, (b) after detachment of the tape, and (c) enlarged view near the area where the tape was detached.

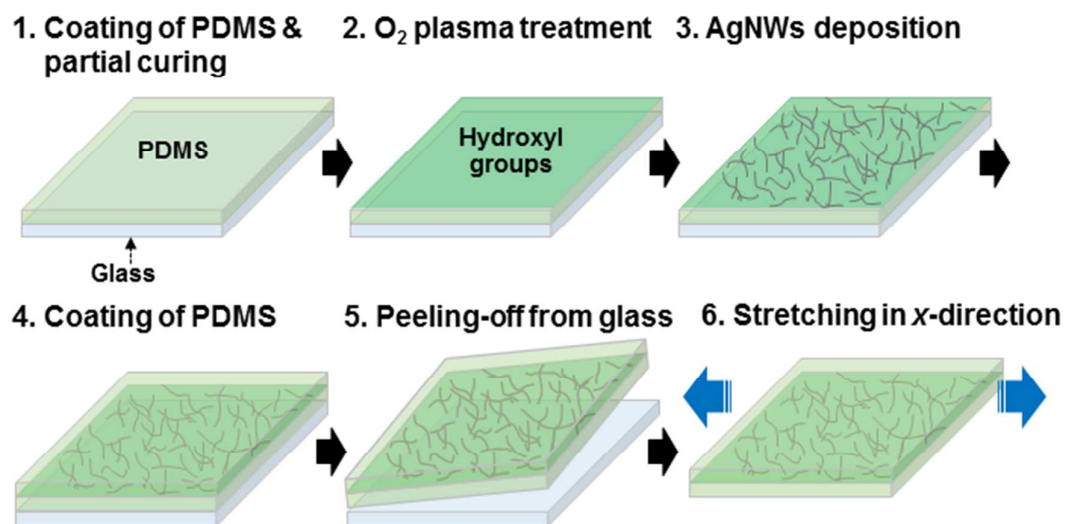

**Figure S4.** Schematic depiction of the fabrication steps of PDMS/AgNWs/PDMS electrodes.

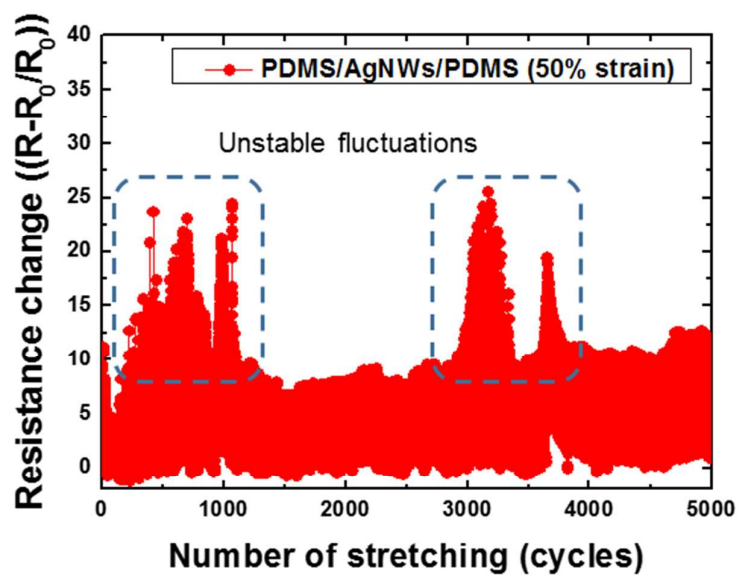

**Figure S5.** Resistance change of the PDMS/AgNWs/PDMS electrode under repeated stretch–release testing with 50% strain.

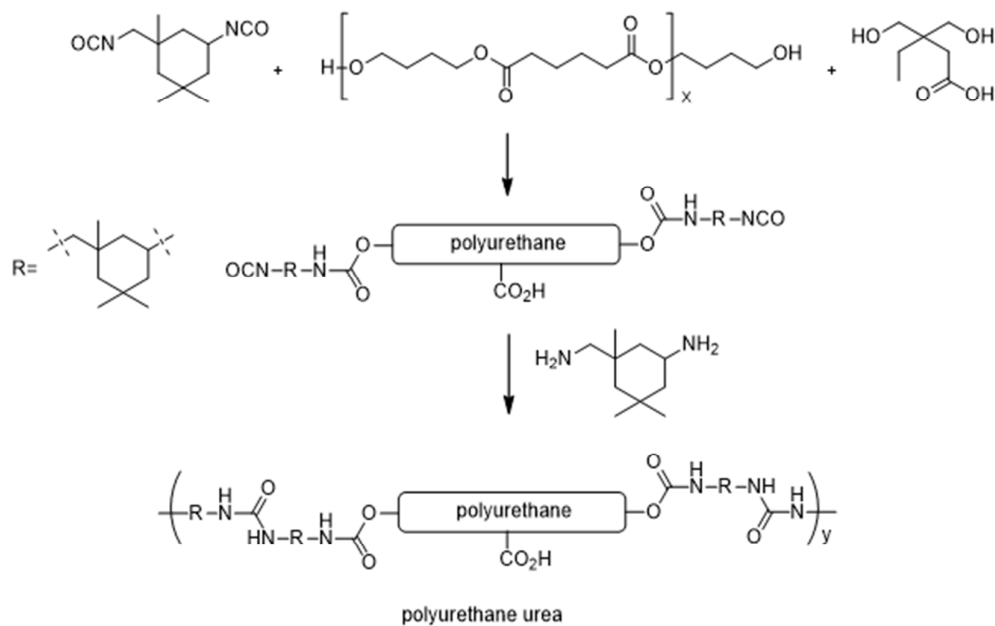

**Figure S6.** Synthesis of polyurethane urea (PUU).

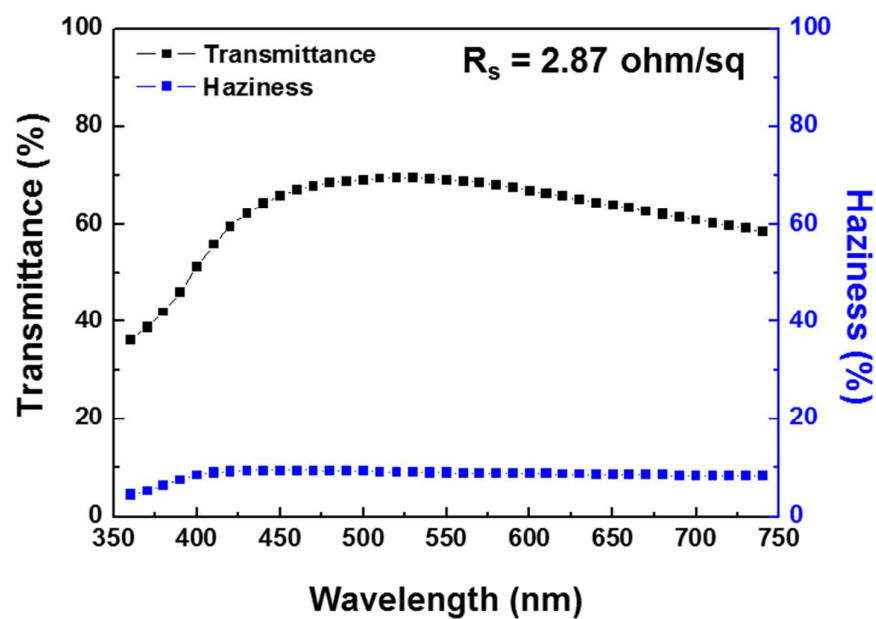

**Figure S7.** Optical characteristics of the PUU/AgNWs/PDMS electrodes.  $R_s$  of the electrode was designed to be around 2.9 ohm/sq.

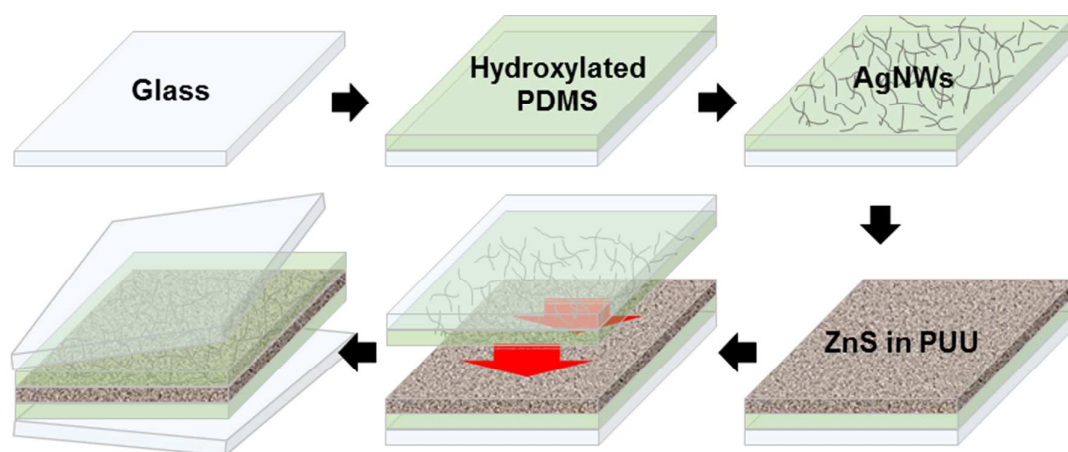

**Figure S8.** Schematic depiction of the fabrication of stretchable, waterproof EL devices.

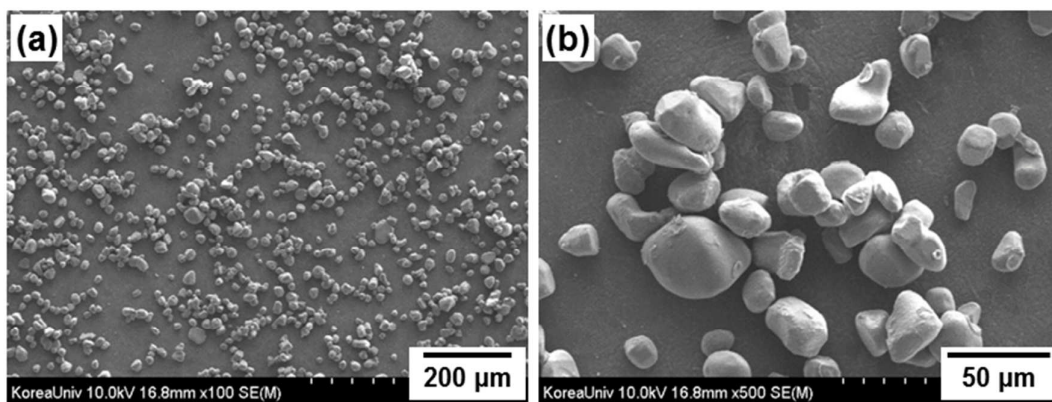

**Figure S9.** ZnS microparticles employed in this study: (a) low magnification and (b) high magnification.

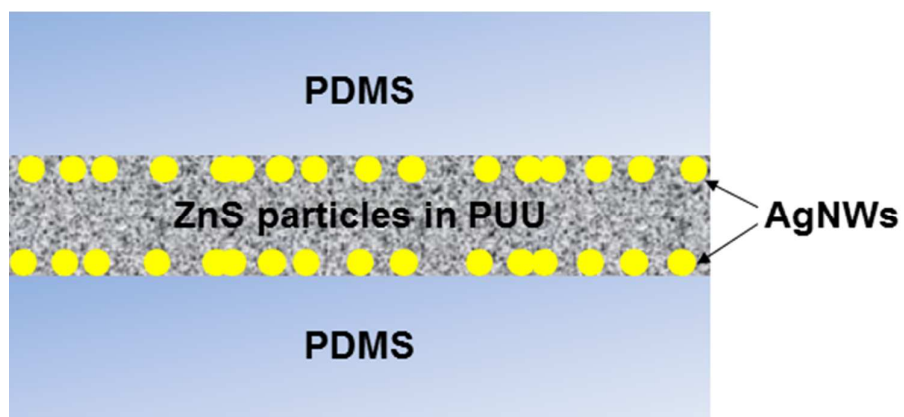

**Figure S10.** Schematic cross-sectional depiction of the stretchable and waterproof devices.



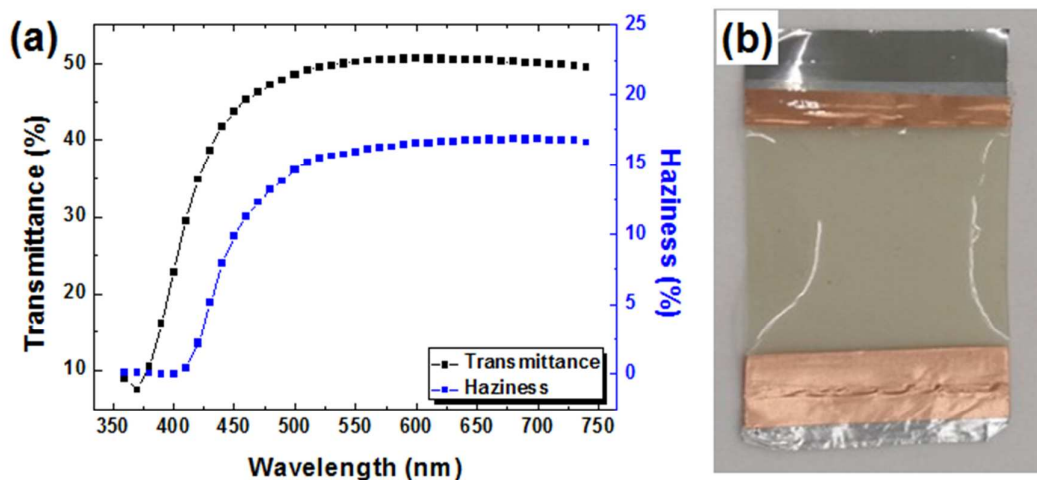

**Figure S11.** (a) Optical characteristics of a fabricated EL device and (b) a device sample placed on a white paper with aligned KETI emblems.

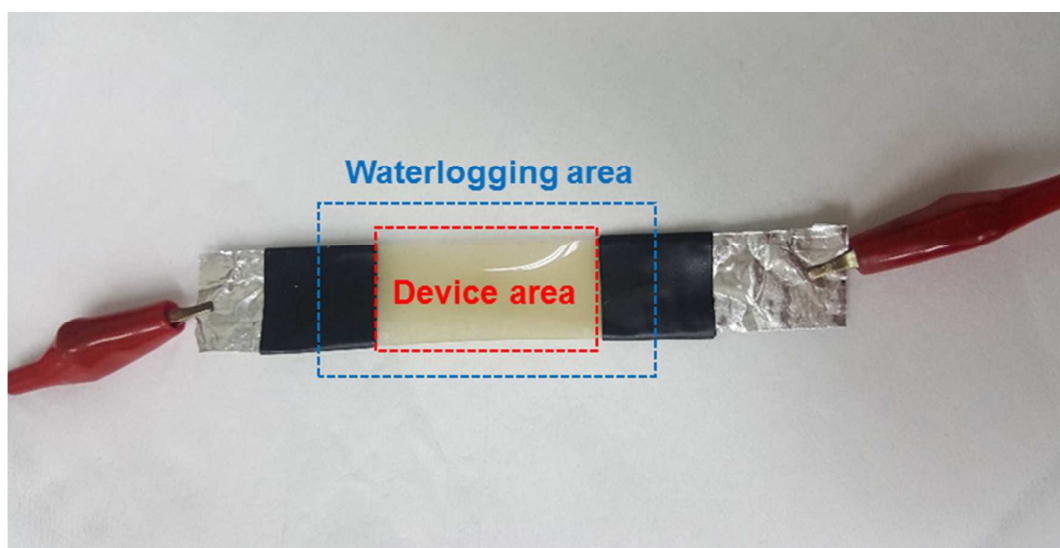

**Figure S12.** Sealing of the AgNW electrodes from exposure to water.

In order to seal the electrodes from an exposure to water, we first used a slice of aluminum tape to make connections between the connectors and the AgNW electrodes, then most part of the aluminum tape was sealed by a slice of black-colored insulation tape (see **Figure S12**). The waterlogging area was indicated by a blue dotted square in the Figure S12, implying that the aluminum or AgNWs electrodes were not exposed to water.

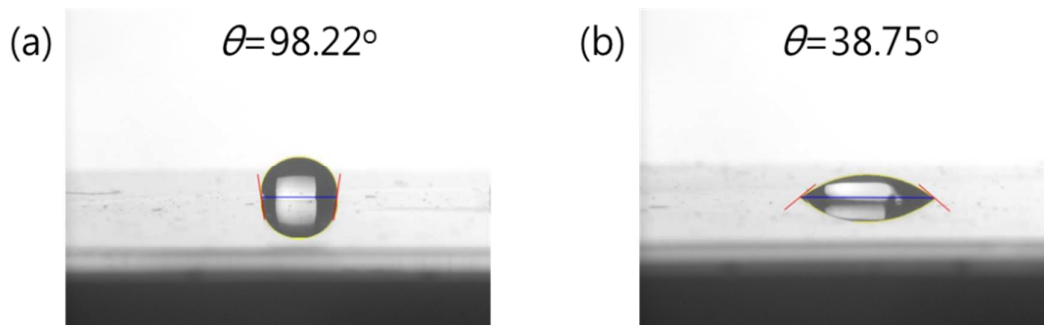

**Figure S13.** The water contact angle of the PDMS (a) before and (b) after the O<sub>2</sub> plasma treatment.

The O<sub>2</sub> plasma treatment on the PDMS film changed the water contact angle from 98.22° to 38.75° indicating that the surface became hydrophilic through the hydroxylation of it.

**Movie S1.** A demonstration of the fabricated stretchable and waterproof EL device.
